# Supplementary material
Source: PubMed Central journal article supplement (PMC9979859)
Supplement: NIHMS1856966-supplement-1.pdf [file NIHMS1856966-supplement-1.pdf]

# Saving Regret and Procrastination: Appendix for Online Publication

## **Axel Börsch-Supan**

Munich Center for the Economics of Aging at the Max Planck Institute for Social Law and Social Policy,  
Munich, Germany  
Technical University of Munich, Germany  
National Bureau of Economic Research, Cambridge, Mass., USA

## **Tabea Bucher-Koenen**

Leibniz-Zentrum für Europäische Wirtschaftsforschung, Mannheim, Germany  
University of Mannheim, Germany  
Munich Center for the Economics of Aging at the Max Planck Institute for Social Law and Social Policy,  
Munich, Germany

## **Michael D. Hurd**

RAND Corporation, Santa Monica, California, USA  
National Bureau of Economic Research, Cambridge, Mass., USA  
NETSPAR, Tilburg, The Netherlands

## **Susann Rohwedder**

RAND Corporation, Santa Monica, California, USA  
NETSPAR, Tilburg, The Netherlands

**This version: 28 Jan 2022**

## **Abstract**

We define saving regret as the wish in hindsight to have saved more earlier in life. We measured saving regret and possible determinants in a survey of U.S. households in which respondents were aged 60-79. We find high levels of saving regret, affirmed by some 58%. Saving regret exhibits significant and plausible correlations with personal characteristics and wealth: Married, older, healthier and wealthier respondents are less likely to report saving regret, suggesting the measure's validity. We find only weak evidence for correlations between saving regret and measures of procrastination: persons with traits associated with procrastination express saving regret about as often as those without those traits.

## **Keywords:**

Retirement saving, procrastination, uncertainty, regret,

## **JEL codes:**

D91, D83, D84, D14, D15

## Appendix: For Online Publication

### A. Variables, Survey Questions, and Data Access

| Variable                                | Survey Question /Coding                                                                                                                                         |
|-----------------------------------------|-----------------------------------------------------------------------------------------------------------------------------------------------------------------|
| <b>Saving regret</b>                    |                                                                                                                                                                 |
| Wish saved more (before revision)       | Indicator if respondent wished to have saved more (version a) / spend less and saved more (version b) over the years                                            |
| Wish saved more (after revision)        | Wish saved more set to 0 if respondents answered "No way I could have cut spending. I could not have saved more."                                               |
| <b>Sociodemographic characteristics</b> |                                                                                                                                                                 |
| Age                                     | respondent age in years                                                                                                                                         |
| Female                                  | respondent gender                                                                                                                                               |
| Married or marriage-like relationship   | respondent household status                                                                                                                                     |
| High school or less                     | indicator for respondents education                                                                                                                             |
| (some) College education                | indicator for respondents education                                                                                                                             |
| Bachelor's degree                       | indicator for respondents education                                                                                                                             |
| Master's degree or higher               | indicator for respondents education                                                                                                                             |
| Households assets                       | Total household assets in \$US                                                                                                                                  |
| Household income                        | Total household income in \$US                                                                                                                                  |
| Black                                   | indicator for respondent race/ethnicity                                                                                                                         |
| Hispanic                                | indicator for respondent race/ethnicity                                                                                                                         |
| Poor self rated health                  | Indicator if respondents rates own health as poor                                                                                                               |
| Poor self rated memory                  | Indicator if respondent rates own memory as poor                                                                                                                |
| <b>Psychometric variables</b>           |                                                                                                                                                                 |
| <i>Personal traits</i>                  | <i>Do you agree or disagree with the following statements? Evaluated on a five-point Likert scale: strongly disagree/disagree/neither/agree/strongly agree:</i> |
| Relaxed person                          | I am a relaxed person                                                                                                                                           |
| Creature of habits                      | I am a creature of habits                                                                                                                                       |
| Open for change                         | I am open for change                                                                                                                                            |
| Optimistic person                       | I am an optimistic person                                                                                                                                       |
| Self-confident                          | I am a self-confident person.                                                                                                                                   |
| Cheerful person                         | I am a cheerful person                                                                                                                                          |
| Pessimistic person                      | I am a pessimistic person                                                                                                                                       |
|                                         | <i>Answer categories: never/sometimes/most of the time/always:</i>                                                                                              |
| Like exciting or risky activities       | How often do you like to do exciting or risky activities?                                                                                                       |

## A. Variables, Survey Questions, and Data Access (continued)

| Variables                               | Survey Questions                                                                                                                                                                                                                                                                                                                                                                                                                                                                                                                                                                                                                                                                                                                                                                                                                                                                                                                                                                                                                                    |
|-----------------------------------------|-----------------------------------------------------------------------------------------------------------------------------------------------------------------------------------------------------------------------------------------------------------------------------------------------------------------------------------------------------------------------------------------------------------------------------------------------------------------------------------------------------------------------------------------------------------------------------------------------------------------------------------------------------------------------------------------------------------------------------------------------------------------------------------------------------------------------------------------------------------------------------------------------------------------------------------------------------------------------------------------------------------------------------------------------------|
| <i>Procrastination and perseverance</i> | <i>Answer categories: never/sometimes/most of the time/always:</i>                                                                                                                                                                                                                                                                                                                                                                                                                                                                                                                                                                                                                                                                                                                                                                                                                                                                                                                                                                                  |
| Put off things you should do            | How often do you put things off you should do but aren't really interested in?                                                                                                                                                                                                                                                                                                                                                                                                                                                                                                                                                                                                                                                                                                                                                                                                                                                                                                                                                                      |
| Give up before starting                 | How often do you give up before you start a task because you don't know where to start?                                                                                                                                                                                                                                                                                                                                                                                                                                                                                                                                                                                                                                                                                                                                                                                                                                                                                                                                                             |
| Try several tasks, don't complete many  | How often do you try to do several things at once, not completing many?                                                                                                                                                                                                                                                                                                                                                                                                                                                                                                                                                                                                                                                                                                                                                                                                                                                                                                                                                                             |
| Settle for mediocre results             | How often do you settle for mediocre results when you could do better?                                                                                                                                                                                                                                                                                                                                                                                                                                                                                                                                                                                                                                                                                                                                                                                                                                                                                                                                                                              |
| Put off things not good at              | How often do you put things off you are not good at?                                                                                                                                                                                                                                                                                                                                                                                                                                                                                                                                                                                                                                                                                                                                                                                                                                                                                                                                                                                                |
| Give up task when difficult             | How often do you give up a task when it gets difficult?                                                                                                                                                                                                                                                                                                                                                                                                                                                                                                                                                                                                                                                                                                                                                                                                                                                                                                                                                                                             |
| Lose motivation during tasks            | How often do you lose motivation in the middle of a task?                                                                                                                                                                                                                                                                                                                                                                                                                                                                                                                                                                                                                                                                                                                                                                                                                                                                                                                                                                                           |
|                                         | <i>Do you agree or disagree with the following statements? Evaluated on a five-point Likert scale: strongly disagree/disagree/neither/agree/strongly agree:</i>                                                                                                                                                                                                                                                                                                                                                                                                                                                                                                                                                                                                                                                                                                                                                                                                                                                                                     |
| Works best under pressure               | I am a person who works best under pressure.                                                                                                                                                                                                                                                                                                                                                                                                                                                                                                                                                                                                                                                                                                                                                                                                                                                                                                                                                                                                        |
| Do what you like today.                 | "People should do what they like today rather than putting it off until tomorrow"                                                                                                                                                                                                                                                                                                                                                                                                                                                                                                                                                                                                                                                                                                                                                                                                                                                                                                                                                                   |
| Life is about having fun                | "Life is about having fun and spending all affordable money on that"                                                                                                                                                                                                                                                                                                                                                                                                                                                                                                                                                                                                                                                                                                                                                                                                                                                                                                                                                                                |
| <b>Supporting Skills</b>                |                                                                                                                                                                                                                                                                                                                                                                                                                                                                                                                                                                                                                                                                                                                                                                                                                                                                                                                                                                                                                                                     |
| Probability Numeracy                    | <p>Score ranging from 0 to 4 depending on the number of correctly answered numeracy questions:</p> <p>First, suppose this bowl has 10 white balls and no red balls. You will be asked to draw one ball without looking. On a scale from 0 percent to 100 percent, what is the percent chance that the ball you draw is red?</p> <p>Now suppose that the bowl has 7 white balls and 3 red balls. You will be asked to draw one ball without looking. What is the percent chance that the ball you draw is white?</p> <p>Imagine that the weather report tells you that the chance it will rain tomorrow is 70 percent. Assuming the weather report accurately reports the chance of rain, what is the chance it will NOT rain tomorrow?</p> <p>Imagine that whether it rains in your town and whether it rains in Paris are unrelated. The chance that it will rain in your town tomorrow is 50 percent. The chance that it will rain in Paris is also 50 percent. What is the chance that it will rain both in your town and in Paris tomorrow?</p> |

## A. Variables, Survey Questions, and Data Access (continued)

| Variables                                  | Survey Questions                                                                                                                                                                                                                                                                                                                                                                                                           |
|--------------------------------------------|----------------------------------------------------------------------------------------------------------------------------------------------------------------------------------------------------------------------------------------------------------------------------------------------------------------------------------------------------------------------------------------------------------------------------|
| Financial literacy                         | Score ranging from 0 to 3 depending on the number of correct answers to the financial literacy questions:                                                                                                                                                                                                                                                                                                                  |
| Interest rate                              | Suppose you had \$100 in a savings account and the interest rate was 2 percent per year. After 5 years, how much do you think you would have in the account if you left the money to grow: [more than \$102, exactly \$102, less than \$102? Don't know.]                                                                                                                                                                  |
| Inflation                                  | Imagine that the interest rate on your savings account was 1 percent per year and inflation was 2 percent per year. After 1 year, would you be able to buy: [more than, exactly the same as, or less than today with the money in this account? Don't know.]                                                                                                                                                               |
| Investment risk                            | Do you think that the following statement is true or false? "Buying a single company stock usually provides a safer return than a Unit Trust. [True, False, Don't know.]                                                                                                                                                                                                                                                   |
| Financial planning horizon                 | Financial planning horizon: next few months/ next year/ next few years/ next 5-10 years/ longer than 10 years/ I don't plan                                                                                                                                                                                                                                                                                                |
| <b>Self-assessed adequacy of resources</b> |                                                                                                                                                                                                                                                                                                                                                                                                                            |
| HH total income sufficient                 | Is [fill for total income] sufficient to meet your spending needs each month? Yes, always/ Most of the time / Rarely/ Never                                                                                                                                                                                                                                                                                                |
| HH resources for future financial needs    | And now a view into the future: Taking into consideration all of your household's wealth and future income and comparing them to your needs in the future, do you think that your household's total financial resources are...? More than enough to meet your future needs/ Just enough to meet your future needs/ Not enough to meet you future needs/ Not nearly enough to meet your future needs/ Uncertain/ Don't know |
| Probability of running out of money        | What are the chances that you will run out of money sometime in the future? Please click a point on the scale. [0 ... 100]                                                                                                                                                                                                                                                                                                 |

**Catalog of studies and questionnaires are available here:**

<https://alpdata.rand.org/?page=data>

First saving regret survey: <https://alpdata.rand.org/index.php?page=data&p=showsurvey&syid=455>

Second saving regret survey: <https://alpdata.rand.org/index.php?page=data&p=showsurvey&syid=487>

**To register for data access (free of charge):**

<https://www.rand.org/research/data/alp/data-access.html>

## B. Additional Tables

**Table A1. Summary Statistics**

|                                            | N    | Mean    | SD        | Min      | Max        |
|--------------------------------------------|------|---------|-----------|----------|------------|
| <b>Saving regret</b>                       |      |         |           |          |            |
| Wish saved more (before revision)          | 1590 | 0.636   | 0.481     | 0        | 1          |
| Wish saved more (after revision)           | 1590 | 0.585   | 0.493     | 0        | 1          |
| <b>Sociodemographic characteristics</b>    |      |         |           |          |            |
| Age                                        | 1590 | 68.0    | 5.6       | 60       | 79         |
| Female                                     | 1590 | 0.534   | 0.499     | 0        | 1          |
| Married or marriage-like relationship      | 1589 | 0.619   | 0.486     | 0        | 1          |
| High school or less                        | 1590 | 0.465   | 0.499     | 0        | 1          |
| (some) College education                   | 1590 | 0.246   | 0.431     | 0        | 1          |
| Bachelor's degree                          | 1590 | 0.140   | 0.347     | 0        | 1          |
| Master's degree of higher                  | 1590 | 0.150   | 0.357     | 0        | 1          |
| Households assets                          | 815  | 542,858 | 1,085,240 | -250,000 | 13,300,000 |
| Household income                           | 1570 | 55,375  | 75,282    | 0        | 2,000,000  |
| Black                                      | 1590 | 0.096   | 0.294     | 0        | 1          |
| Hispanic                                   | 1590 | 0.101   | 0.301     | 0        | 1          |
| Poor self-rated health                     | 1590 | 0.244   | 0.429     | 0        | 1          |
| Poor self-rated memory                     | 1590 | 0.123   | 0.329     | 0        | 1          |
| <b>Shocks</b>                              |      |         |           |          |            |
| Any negative shocks                        | 1590 | 0.561   | 0.496     | 0        | 1          |
| Any positive shocks                        | 1590 | 0.441   | 0.497     | 0        | 1          |
| <b>Self-perceived personal traits</b>      |      |         |           |          |            |
| A) relaxed person                          | 1590 | 3.609   | 0.916     | 1        | 5          |
| B) creature of habits                      | 1590 | 3.813   | 0.802     | 1        | 5          |
| C) open for change                         | 1588 | 3.536   | 0.869     | 1        | 5          |
| D) optimistic person                       | 1590 | 3.783   | 0.907     | 1        | 5          |
| E) self-confident                          | 1590 | 3.854   | 0.838     | 1        | 5          |
| F) cheerful person                         | 1589 | 3.864   | 0.791     | 1        | 5          |
| G) pessimistic person                      | 1590 | 2.363   | 0.972     | 1        | 5          |
| H) like exciting or risky activities       | 1590 | 1.743   | 0.624     | 1        | 4          |
| <b>Procrastination and perseverance</b>    |      |         |           |          |            |
| I) put off things you should do            | 1590 | 2.144   | 0.500     | 1        | 4          |
| J) give up before starting                 | 1590 | 1.583   | 0.603     | 1        | 4          |
| K) try several tasks, don't complete many  | 1590 | 1.777   | 0.697     | 1        | 4          |
| L) settle for mediocre results             | 1590 | 1.598   | 0.583     | 1        | 4          |
| M) put off things not good at              | 1590 | 2.069   | 0.619     | 1        | 4          |
| N) put off difficult things                | 1590 | 1.642   | 0.636     | 1        | 4          |
| O) lose motivation during tasks            | 1590 | 1.709   | 0.554     | 1        | 4          |
| P) works best under pressure               | 1590 | 3.024   | 0.977     | 1        | 5          |
| Q) do what you like today                  | 1590 | 3.954   | 0.828     | 1        | 5          |
| R) life about having fun                   | 1590 | 2.557   | 1.053     | 1        | 5          |
| <b>Supporting Skills</b>                   |      |         |           |          |            |
| Probability numeracy                       | 1173 | 2.565   | 0.982     | 0        | 4          |
| Financial literacy                         | 983  | 2.198   | 0.946     | 0        | 3          |
| Financial planning horizon                 | 1202 | 3.187   | 1.495     | 1        | 6          |
| <b>Self-assessed adequacy of resources</b> |      |         |           |          |            |
| HH total income sufficient                 | 1590 | 1.731   | 0.774     | 1        | 4          |
| HH resources for future financial needs    | 1590 | 3.047   | 2.024     | 1        | 9          |
| Probability of running out of money        | 1581 | 33.644  | 26.219    | 0        | 100        |

**Table A2: Saving Regret by self-perceived personal traits**

|                                             | N   | %    | Saving Regret (after revision) |            |        |
|---------------------------------------------|-----|------|--------------------------------|------------|--------|
|                                             |     |      | Mean                           | Strd. Err. | T-test |
| <b>A) Relaxed person</b>                    |     |      |                                |            |        |
| Strongly disagree                           | 33  | 2.1  | 0.621                          | 0.101      | ns     |
| Disagree                                    | 186 | 11.7 | 0.639                          | 0.033      | ns     |
| Neither agree or disagree                   | 345 | 21.7 | 0.582                          | 0.027      | ns     |
| Agree                                       | 833 | 52.4 | 0.573                          | 0.017      | ref.   |
| Strongly agree                              | 194 | 12.2 | 0.583                          | 0.035      | ns     |
| <b>B) Creature of habits</b>                |     |      |                                |            |        |
| Strongly disagree                           | 19  | 1.2  | 0.801                          | 0.1        | ns     |
| Disagree                                    | 93  | 5.9  | 0.556                          | 0.052      | ns     |
| Neither agree or disagree                   | 296 | 18.6 | 0.586                          | 0.029      | ns     |
| Agree                                       | 941 | 59.2 | 0.596                          | 0.016      | ref.   |
| Strongly agree                              | 241 | 15.2 | 0.536                          | 0.031      | ns     |
| <b>C) Open for change</b>                   |     |      |                                |            |        |
| Strongly disagree                           | 25  | 1.5  | 0.4                            | 0.126      | ns     |
| Disagree                                    | 181 | 11.4 | 0.593                          | 0.043      | ns     |
| Neither agree or disagree                   | 451 | 28.4 | 0.544                          | 0.024      | ns     |
| Agree                                       | 784 | 49.4 | 0.597                          | 0.017      | ref.   |
| Strongly agree                              | 148 | 9.3  | 0.665                          | 0.037      | ns     |
| <b>D) Optimistic person</b>                 |     |      |                                |            |        |
| Strongly disagree                           | 36  | 2.2  | 0.627                          | 0.103      | ns     |
| Disagree                                    | 106 | 6.7  | 0.548                          | 0.054      | ns     |
| Neither agree or disagree                   | 332 | 20.9 | 0.579                          | 0.029      | ns     |
| Agree                                       | 811 | 51   | 0.601                          | 0.017      | ref.   |
| Strongly agree                              | 305 | 19.2 | 0.556                          | 0.027      | ns     |
| <b>E) Self-confident</b>                    |     |      |                                |            |        |
| Strongly disagree                           | 12  | 0.8  | 0.434                          | 0.157      | ns     |
| Disagree                                    | 111 | 7    | 0.597                          | 0.047      | ns     |
| Neither agree or disagree                   | 284 | 17.9 | 0.607                          | 0.03       | ns     |
| Agree                                       | 871 | 54.8 | 0.589                          | 0.017      | ref.   |
| Strongly agree                              | 312 | 19.6 | 0.555                          | 0.027      | ns     |
| <b>F) Cheerful person</b>                   |     |      |                                |            |        |
| Strongly disagree                           | 19  | 1.2  | 0.551                          | 0.166      | ns     |
| Disagree                                    | 53  | 3.3  | 0.557                          | 0.061      | ns     |
| Neither agree or disagree                   | 347 | 21.9 | 0.554                          | 0.029      | *      |
| Agree                                       | 876 | 55.1 | 0.617                          | 0.016      | ref.   |
| Strongly agree                              | 294 | 18.5 | 0.534                          | 0.028      | *      |
| <b>G) Pessimistic person</b>                |     |      |                                |            |        |
| Strongly disagree                           | 325 | 20.4 | 0.596                          | 0.025      | ns     |
| Disagree                                    | 586 | 36.9 | 0.601                          | 0.019      | ref.   |
| Neither agree or disagree                   | 474 | 29.8 | 0.583                          | 0.025      | ns     |
| Agree                                       | 187 | 11.7 | 0.522                          | 0.041      | ns     |
| Strongly agree                              | 18  | 1.2  | 0.564                          | 0.108      | ns     |
| <b>H) Like exciting or risky activities</b> |     |      |                                |            |        |
| Never                                       | 553 | 34.8 | 0.637                          | 0.022      | **     |
| Some-time                                   | 905 | 56.9 | 0.567                          | 0.016      | ref.   |
| Most of the time                            | 119 | 7.5  | 0.474                          | 0.045      | ns     |
| Always                                      | 13  | 0.8  | 0.684                          | 0.113      | ns     |

Note: We report the mean of saving regret and the standard error of the mean, pooling respondents across the two question formats for saving regret (unframed and framed). The t-test refers to a t-test of the indicated category vs. the reference category (ref). The most prevalent category is used as the reference group. ns= not significant, \*  $p<0.05$ , \*\*  $p<0.01$ , \*\*\*  $p<0.001$ . Data are weighted.

**Table A3: Saving Regret by measures of procrastination and perseverance**

|                                                  | N    | %    | Saving Regret (after revision) |            |        |
|--------------------------------------------------|------|------|--------------------------------|------------|--------|
|                                                  |      |      | Mean                           | Strd. Err. | T-test |
| <b>I) Put off things you should do</b>           |      |      |                                |            |        |
| Never                                            | 76   | 4.8  | 0.459                          | 0.061      | *      |
| Sometimes                                        | 1232 | 77.5 | 0.589                          | 0.014      | ref.   |
| Most of the time                                 | 258  | 16.2 | 0.599                          | 0.03       | ns     |
| Always                                           | 24   | 1.5  | 0.639                          | 0.096      | ns     |
| <b>J) Give up before starting</b>                |      |      |                                |            |        |
| Never                                            | 750  | 47.2 | 0.547                          | 0.018      | *      |
| Sometimes                                        | 760  | 47.8 | 0.611                          | 0.018      | ref.   |
| Most of the time                                 | 72   | 4.6  | 0.711                          | 0.066      | ns     |
| Always                                           | 8    | 0.5  | 0.524                          | 0.177      | ns     |
| <b>K) Try several tasks, don't complete many</b> |      |      |                                |            |        |
| Never                                            | 564  | 35.5 | 0.537                          | 0.021      | **     |
| Sometimes                                        | 855  | 53.8 | 0.625                          | 0.016      | ref.   |
| Most of the time                                 | 132  | 8.3  | 0.569                          | 0.043      | ns     |
| Always                                           | 39   | 2.4  | 0.459                          | 0.109      | *      |
| <b>L) Settle for mediocre results</b>            |      |      |                                |            |        |
| Never                                            | 715  | 45   | 0.588                          | 0.018      | ns     |
| Sometimes                                        | 802  | 50.4 | 0.591                          | 0.018      | ref.   |
| Most of the time                                 | 69   | 4.4  | 0.471                          | 0.065      | ns     |
| Always                                           | 3    | 0.2  | 0.858                          | 0.202      | ns     |
| <b>M) Put off things not good at</b>             |      |      |                                |            |        |
| Never                                            | 230  | 14.5 | 0.585                          | 0.033      | ns     |
| Sometimes                                        | 1044 | 65.6 | 0.574                          | 0.015      | ref.   |
| Most of the time                                 | 293  | 18.4 | 0.607                          | 0.03       | ns     |
| Always                                           | 23   | 1.5  | 0.798                          | 0.09       | *      |
| <b>N) Put off difficult things</b>               |      |      |                                |            |        |
| Never                                            | 697  | 43.8 | 0.567                          | 0.019      | ns     |
| Sometimes                                        | 776  | 48.8 | 0.592                          | 0.017      | ref.   |
| Most of the time                                 | 106  | 6.7  | 0.62                           | 0.053      | ns     |
| Always                                           | 11   | 0.7  | 0.882                          | 0.144      | ns     |
| <b>O) Lose motivation during tasks</b>           |      |      |                                |            |        |
| Never                                            | 534  | 33.6 | 0.601                          | 0.021      | ns     |
| Sometimes                                        | 993  | 62.4 | 0.58                           | 0.016      | ref.   |
| Most of the time                                 | 55   | 3.5  | 0.526                          | 0.07       | ns     |
| Always                                           | 8    | 0.5  | 0.579                          | 0.175      | ns     |
| <b>P) Works best under pressure</b>              |      |      |                                |            |        |
| Strongly disagree                                | 96   | 6.0  | 0.665                          | 0.051      | *      |
| Disagree                                         | 359  | 22.6 | 0.604                          | 0.027      | ns     |
| Neither agree or disagree                        | 639  | 40.2 | 0.556                          | 0.02       | ref.   |
| Agree                                            | 404  | 25.4 | 0.58                           | 0.023      | ns     |
| Strongly agree                                   | 92   | 5.8  | 0.651                          | 0.051      | ns     |
| <b>Q) Do what you like today</b>                 |      |      |                                |            |        |
| Strongly disagree                                | 23   | 1.4  | 0.555                          | 0.128      | ns     |
| Disagree                                         | 65   | 4.1  | 0.515                          | 0.056      | ns     |
| Neither agree or disagree                        | 251  | 15.8 | 0.551                          | 0.03       | ns     |
| Agree                                            | 875  | 55.0 | 0.591                          | 0.017      | ref.   |
| Strongly agree                                   | 377  | 23.7 | 0.609                          | 0.025      | ns     |
| <b>R) Life is about having fun</b>               |      |      |                                |            |        |
| Strongly disagree                                | 237  | 14.9 | 0.621                          | 0.032      | ns     |
| Disagree                                         | 613  | 38.5 | 0.603                          | 0.019      | ref.   |
| Neither agree or disagree                        | 420  | 26.4 | 0.523                          | 0.024      | *      |
| Agree                                            | 256  | 16.1 | 0.616                          | 0.033      | ns     |
| Strongly agree                                   | 64   | 4.0  | 0.558                          | 0.065      | ns     |

Note: We report the mean of saving regret and the standard error of the mean, pooling respondents across the two question formats for saving regret (unframed and framed). The t-test refers to a t-test of the indicated category vs. the reference category (ref). The most prevalent category is used as the reference group. ns= not significant, \*  $p < 0.05$ , \*\*  $p < 0.01$ , \*\*\*  $p < 0.001$ . Data are weighted.

**Table A4: Linear probability model, wealth included. Effect on Probability of Expressing Saving Regret**

|                                                        | (1)                  | (2)                  | (3)                  | (4)                 | (5)                 |
|--------------------------------------------------------|----------------------|----------------------|----------------------|---------------------|---------------------|
| Age: 60-64 (Ref.)                                      |                      |                      |                      |                     |                     |
| Age: 65-69                                             | -0.026<br>(0.029)    | -0.013<br>(0.029)    | -0.014<br>(0.029)    | -0.011<br>(0.029)   | -0.011<br>(0.029)   |
| Age: 70-74                                             | -0.083**<br>(0.033)  | -0.054<br>(0.033)    | -0.047<br>(0.035)    | -0.047<br>(0.035)   | -0.046<br>(0.035)   |
| Age: 75-79                                             | -0.187***<br>(0.042) | -0.154***<br>(0.041) | -0.156**<br>(0.048)  | -0.148**<br>(0.048) | -0.146**<br>(0.048) |
| Female                                                 | -0.019<br>(0.025)    | -0.017<br>(0.024)    | -0.018<br>(0.025)    | -0.032<br>(0.026)   | -0.040<br>(0.026)   |
| Spouse                                                 | -0.073**<br>(0.026)  | -0.038<br>(0.026)    | -0.030<br>(0.026)    | -0.031<br>(0.026)   | -0.029<br>(0.026)   |
| High school or less (Ref.)<br>(some) College education | 0.061<br>(0.037)     | 0.047<br>(0.036)     | 0.040<br>(0.037)     | 0.028<br>(0.037)    | 0.025<br>(0.037)    |
| Bachelor's degree                                      | 0.015<br>(0.042)     | 0.010<br>(0.041)     | 0.015<br>(0.042)     | -0.003<br>(0.042)   | -0.005<br>(0.042)   |
| Master's degree or higher                              | -0.053<br>(0.043)    | -0.054<br>(0.043)    | -0.039<br>(0.044)    | -0.061<br>(0.045)   | -0.061<br>(0.045)   |
| Income (lowest quartile) (Ref.)                        |                      |                      |                      |                     |                     |
| Income (2nd quartile)                                  | -0.011<br>(0.039)    | -0.005<br>(0.039)    | -0.000<br>(0.039)    | 0.002<br>(0.039)    | -0.000<br>(0.039)   |
| Income (3rd quartile)                                  | 0.005<br>(0.039)     | 0.031<br>(0.038)     | 0.037<br>(0.039)     | 0.028<br>(0.039)    | 0.019<br>(0.039)    |
| Income (highest quartile)                              | -0.060<br>(0.039)    | -0.018<br>(0.039)    | -0.014<br>(0.040)    | -0.023<br>(0.040)   | -0.035<br>(0.040)   |
| Income (missing)                                       | -0.162<br>(0.110)    | -0.124<br>(0.109)    | -0.128<br>(0.110)    | -0.128<br>(0.110)   | -0.152<br>(0.110)   |
| Wealth(lowest quartile) (Ref.)                         |                      |                      |                      |                     |                     |
| Wealth(2nd quartile)                                   | 0.003<br>(0.054)     | -0.001<br>(0.053)    | 0.007<br>(0.053)     | 0.022<br>(0.053)    | 0.020<br>(0.053)    |
| Wealth(3rd quartile)                                   | -0.070<br>(0.050)    | -0.059<br>(0.049)    | -0.053<br>(0.050)    | -0.044<br>(0.050)   | -0.045<br>(0.050)   |
| Wealth(highest quartile)                               | -0.257***<br>(0.052) | -0.205***<br>(0.051) | -0.185***<br>(0.053) | -0.172**<br>(0.053) | -0.167**<br>(0.054) |
| Wealth(missing)                                        | -0.096*<br>(0.043)   | -0.075<br>(0.042)    | -0.083<br>(0.045)    | -0.068<br>(0.045)   | -0.072<br>(0.045)   |
| Black                                                  | 0.061<br>(0.049)     | 0.060<br>(0.049)     | 0.057<br>(0.050)     | 0.043<br>(0.050)    | 0.029<br>(0.050)    |
| Hispanic                                               | 0.089*<br>(0.050)    | 0.097*<br>(0.049)    | 0.092*<br>(0.050)    | 0.081<br>(0.050)    | 0.071<br>(0.050)    |
| Poor self-rated health                                 | 0.095**<br>(0.034)   | 0.058<br>(0.034)     | 0.070*<br>(0.034)    | 0.085*<br>(0.035)   | 0.091**<br>(0.035)  |
| Poor self-rated memory                                 | -0.036<br>(0.043)    | -0.044<br>(0.043)    | -0.044<br>(0.043)    | -0.038<br>(0.043)   | -0.051<br>(0.043)   |

Note: \* p&lt;0.05, \*\*p&lt;0.01, \*\*\* p&lt;0.001



**Table A4: Linear probability model, wealth included (continued)**

|                                           | (1)                 | (2)                 | (3)                 | (4)                 | (5)                |
|-------------------------------------------|---------------------|---------------------|---------------------|---------------------|--------------------|
| <b>Self-perceived personal traits</b>     |                     |                     |                     |                     |                    |
| A) relaxed person                         |                     |                     |                     | -0.020<br>(0.015)   | -0.016<br>(0.015)  |
| B) creature of habits                     |                     |                     |                     | 0.017<br>(0.015)    | 0.017<br>(0.015)   |
| C) open for change                        |                     |                     |                     | 0.055***<br>(0.017) | 0.052**<br>(0.017) |
| D) optimistic person                      |                     |                     |                     | 0.002<br>(0.021)    | -0.000<br>(0.021)  |
| E) self-confident                         |                     |                     |                     | -0.014<br>(0.018)   | -0.019<br>(0.018)  |
| F) cheerful person                        |                     |                     |                     | 0.009<br>(0.021)    | 0.008<br>(0.021)   |
| G) pessimistic person                     |                     |                     |                     | -0.024<br>(0.015)   | -0.029<br>(0.015)  |
| H) like exciting or risky activities      |                     |                     |                     | -0.031<br>(0.020)   | -0.035<br>(0.020)  |
| <b>Procrastination and perseverance</b>   |                     |                     |                     |                     |                    |
| I) put off things you should do           |                     |                     |                     |                     | 0.037<br>(0.027)   |
| J) give up before starting                |                     |                     |                     |                     | -0.004<br>(0.025)  |
| K) try several tasks, don't complete many |                     |                     |                     |                     | 0.056**<br>(0.021) |
| L) settle for mediocre results            |                     |                     |                     |                     | -0.017<br>(0.025)  |
| M) put off things not good at             |                     |                     |                     |                     | -0.010<br>(0.024)  |
| N) put off difficult things               |                     |                     |                     |                     | 0.031<br>(0.026)   |
| O) lose motivation during tasks           |                     |                     |                     |                     | -0.039<br>(0.027)  |
| P) works best under pressure              |                     |                     |                     |                     | 0.034**<br>(0.013) |
| Q) do what you like today                 |                     |                     |                     |                     | 0.017<br>(0.015)   |
| R) life about having fun                  |                     |                     |                     |                     | -0.019<br>(0.013)  |
| Constant                                  | 0.764***<br>(0.061) | 0.679***<br>(0.062) | 0.611***<br>(0.104) | 0.565***<br>(0.160) | 0.401*<br>(0.183)  |
| Numeracy, Financial literacy, Planning    |                     |                     | X                   | X                   | X                  |
| Financial shocks                          |                     | X                   | X                   | X                   | X                  |
| <b>N</b>                                  | 1589                | 1589                | 1589                | 1586                | 1586               |
| <b>Adj. R-squared</b>                     | 0.077               | 0.104               | 0.111               | 0.115               | 0.122              |

Note: \* p<0.05, \*\*p<0.01, \*\*\* p<0.001
